# Supplementary material for: Organic crystalline monolayers for ideal behaviours in organic field-effect transistors
Source: Royal Society of Chemistry journal article supplement (doi:10.1039/d1tc02621f), 2021-01-01
Supplement: d1tc02621f1.pdf [file d1tc02621f1.pdf]

## **Organic crystalline monolayers for ideal-behaviours in organic field-effect transistors**

Mingchao Xiao<sup>ab</sup>, Xi Zhang<sup>b</sup>, Jie Liu<sup>b</sup>, Xike Gao<sup>c</sup>, Chuan Liu<sup>d\*</sup>, Zitong Liu<sup>e</sup>, Shuai Wang<sup>a\*</sup>, Lang Jiang<sup>b\*</sup>

<sup>a</sup>Key laboratory of Material Chemistry for Energy Conversion and Storage, Ministry of Education, School of Chemistry and Chemical Engineering, Huazhong University of Science and Technology, Wuhan, 430074, China.

<sup>b</sup>Beijing National Laboratory for Molecular Sciences, Key Laboratory of Organic Solids, Institute of Chemistry Chinese Academy of Sciences, Beijing 100190, China.

<sup>c</sup>Shanghai Institute of Organic Chemistry, Chinese Academy of Sciences, Shanghai, 200032, China

<sup>d</sup>State Key Laboratory of Optoelectronic Materials and Technologies, Guangdong Province Key Laboratory of Display Material and Technology, School of Physics and Engineering, School of Microelectronics, Sun Yat-sen University, Guangzhou 510275, China

<sup>e</sup>China State Key Laboratory of Applied Organic Chemistry (SKLAOC), College of Chemistry and Chemical Engineering, Lanzhou University, Lanzhou 730000, China

† Electronic Supplementary Information (ESI) available. See DOI: 10.1039/x0xx00000x

## Experimental

**Materials and method:** IDTBT was purchased from Derthon Optoelectronic Materials Co. Ltd (China). NDI and CMUT was synthesized as reported in literatures. The mixture of IDTBT and NDI was dissolved in chlorobenzene with a constant concentration of IDTBT (4 mg/mL). The IDTBT-NDI blend films were prepared by spin-coating the compound of IDTBT and NDI solution on the OTS modified  $\text{SiO}_2/\text{Si}^{++}$  substrates at 2000 rpm for 60 s. Then, the films were annealed at 90 °C for 20 min.

**Measurements:** The optical and fluorescent images of IDTBT-NDI films were carried out by DM4M fluorescent microscope. The atomic force microscopy (AFM) and high-resolution atomic force microscopy images (HR-AFM) images were carried out by Cypher ES Enviromental AFM. The Grazing-Incidence Wide-Angle X-ray Scattering (GIWAXS) were carried out at the 8ID-E beamline at the Advanced Photon Source (APS), Argonne National Laboratory, using X-rays with a wavelength of  $\lambda = 1.136 \text{ \AA}$  and a beam size of B200 mm (h) and 20 mm (v). The electrical characteristics of the OFETs were measured by Keithley 4200-SCS and Agilent B1500A semiconductor parameter analyzer.

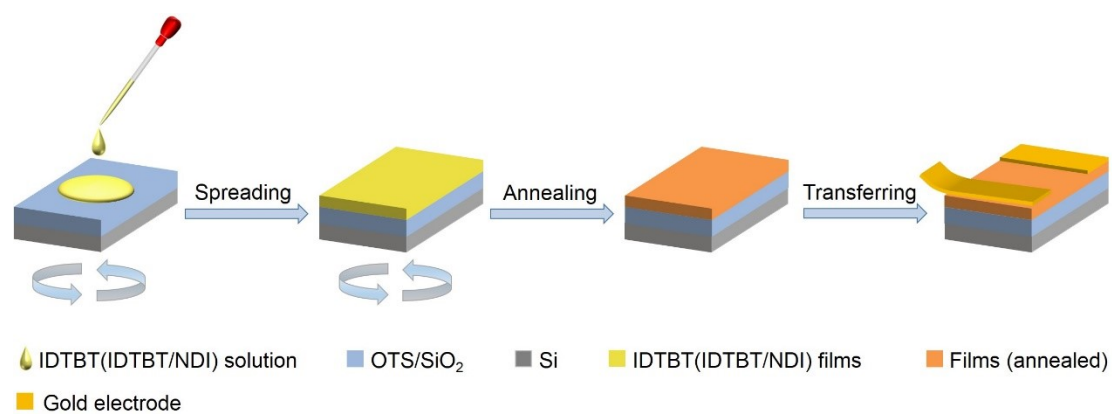

Fig. S1. Schematic diagram of devices fabricated by IDTBT or IDTBT/NDI films on OTS.

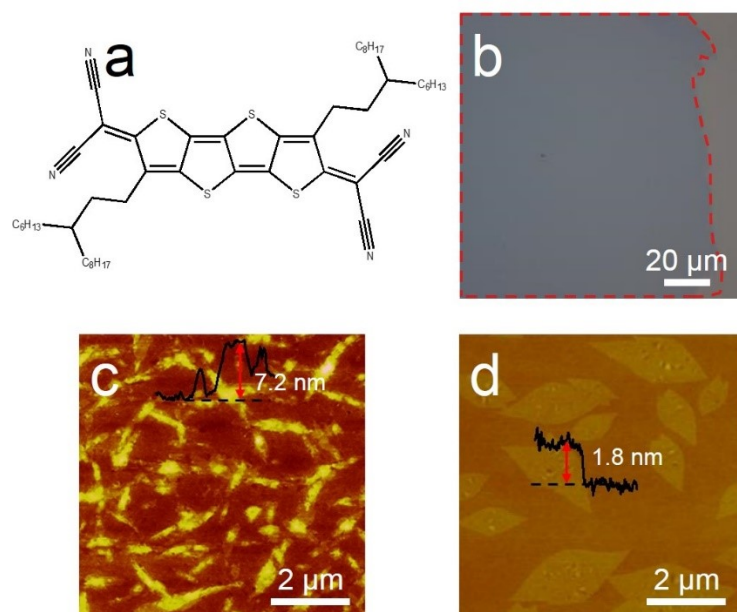

Fig. S2. (a) Molecular structure of CMUT. (b) Optical image of CMUT monolayer by drop casting. (c-d) AFM image of CMUT and NDI films by phase separation method.

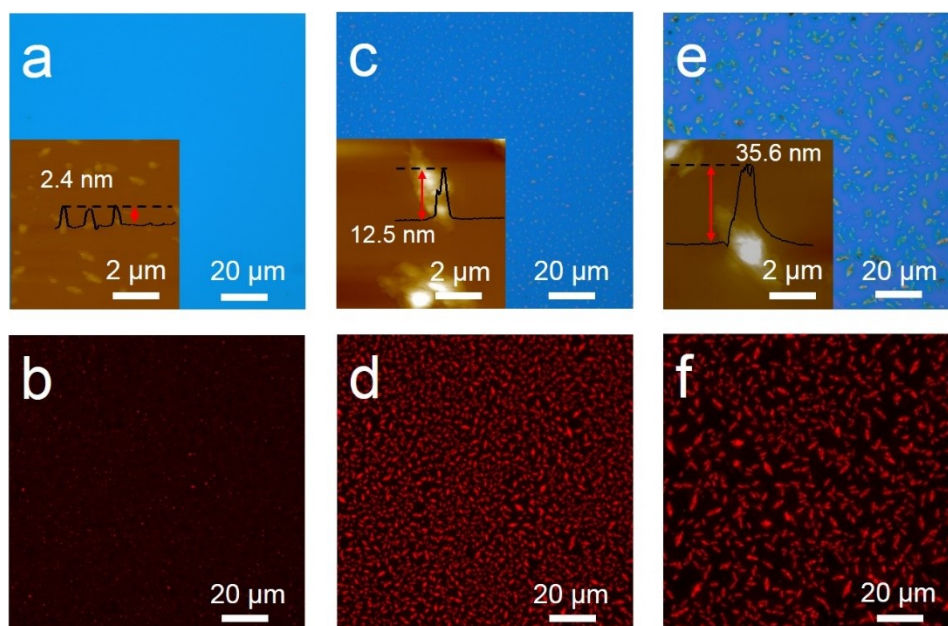

Fig. S3. (a-b) Optical image and fluorescence image of the surface morphology of IDTBT/NDI films with mass ratio at 4:0.2. In fluorescence image, the excitation wavelength is at 530 nm (the red region and dark region are NDI and IDTBT films, respectively). (c-d) and (e-f) are the surface morphology of IDTBT/NDI films with mass ratio at 4:0.5 and 4:1. The insert pictures are corresponding AFM images.

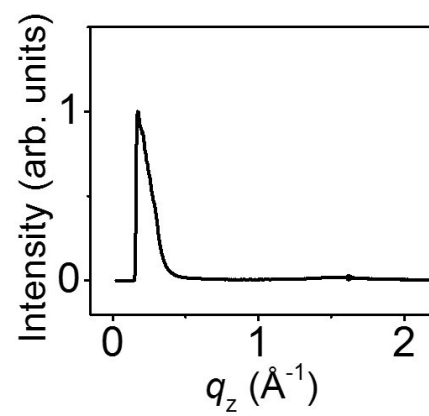

Fig. S4. The 1D GIWAXS plots of IDTBT films along out-of-plane directions.

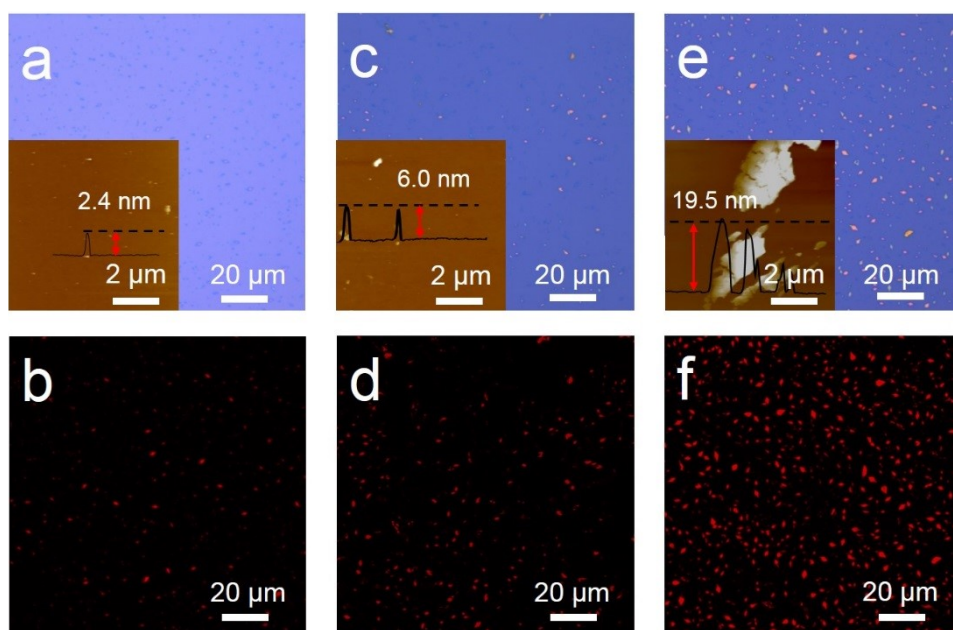

Fig. S5. (a-b) Optical image and fluorescence image of the bottom interface morphology of IDTBT/NDI films with mass ratio at 4:0.2. In fluorescence image, the excitation wavelength is at 530 nm (the red region and dark region are NDI and IDTBT films, respectively). (c-d) and (e-f) are the interface morphology of IDTBT/NDI films with mass ratio at 4:0.5 and 4:1. The insert pictures are corresponding AFM images.

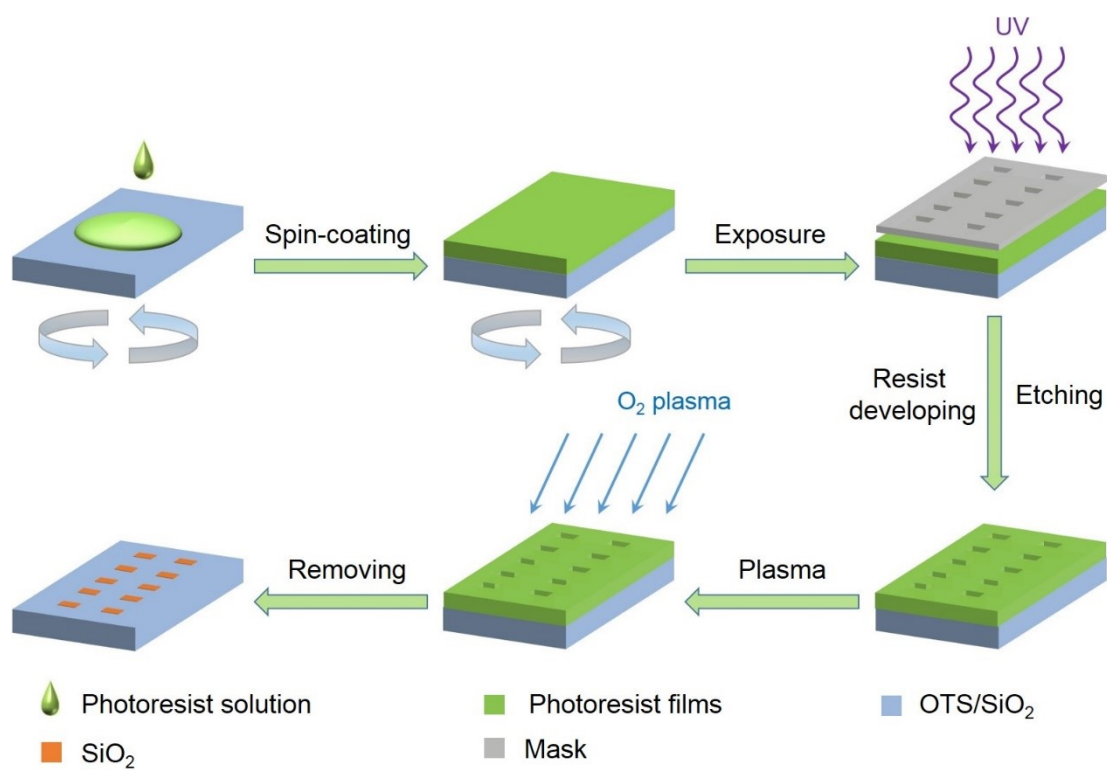

Fig. S6. Schematic diagram of lithography for pattern OTS substrate.

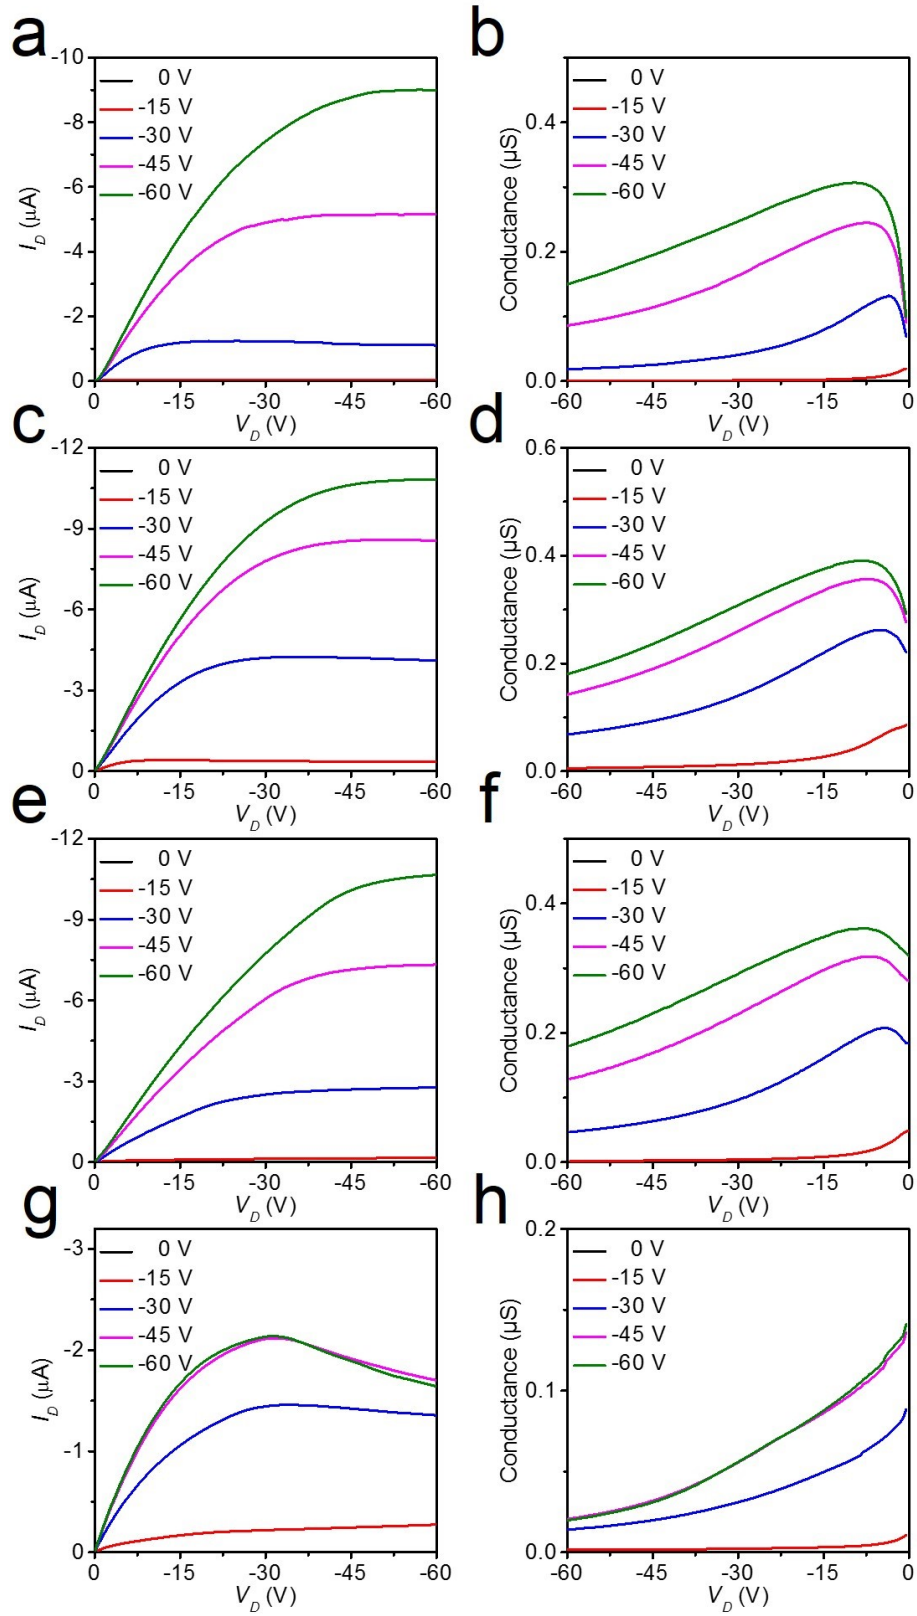

Fig. S7. (a-b) Electrical properties of the devices based on IDTBT films: (a) Output characteristics; (b) conductance. (c-h) Electrical properties of the devices based on IDTBT/NDI films with various mass ratio: (c-d) mass ratio at 4:0.2; (e-f) mass ratio at 4:0.5; (g-h) mass ratio at 4:1.

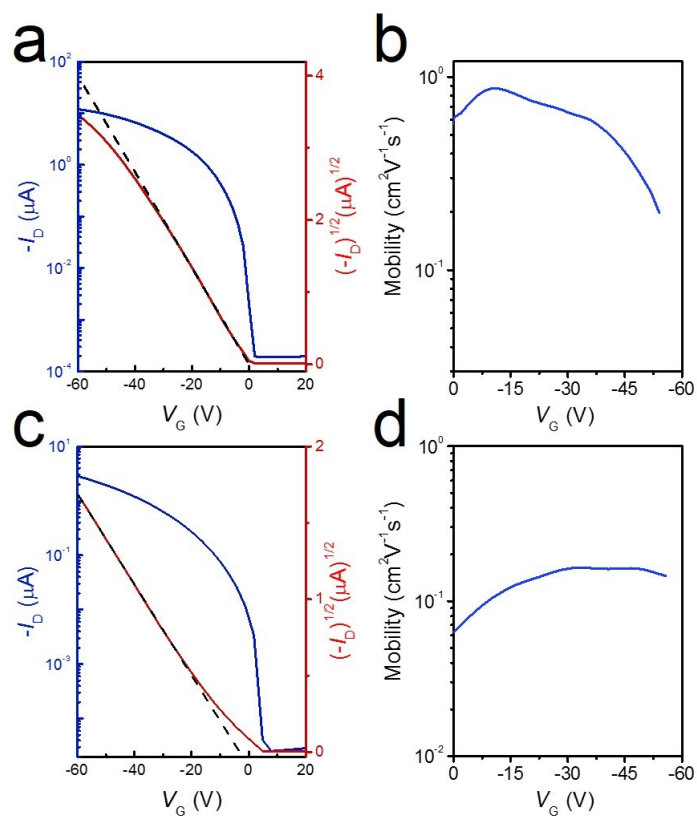

Fig. S8. (a, b) Electrical characteristics of DPP films. (a) Transfer characteristics of DPP based devices under ambient conditions. (b) Mobility versus gate voltage. (c, d) electrical characteristics of DPP-NDI based devices.

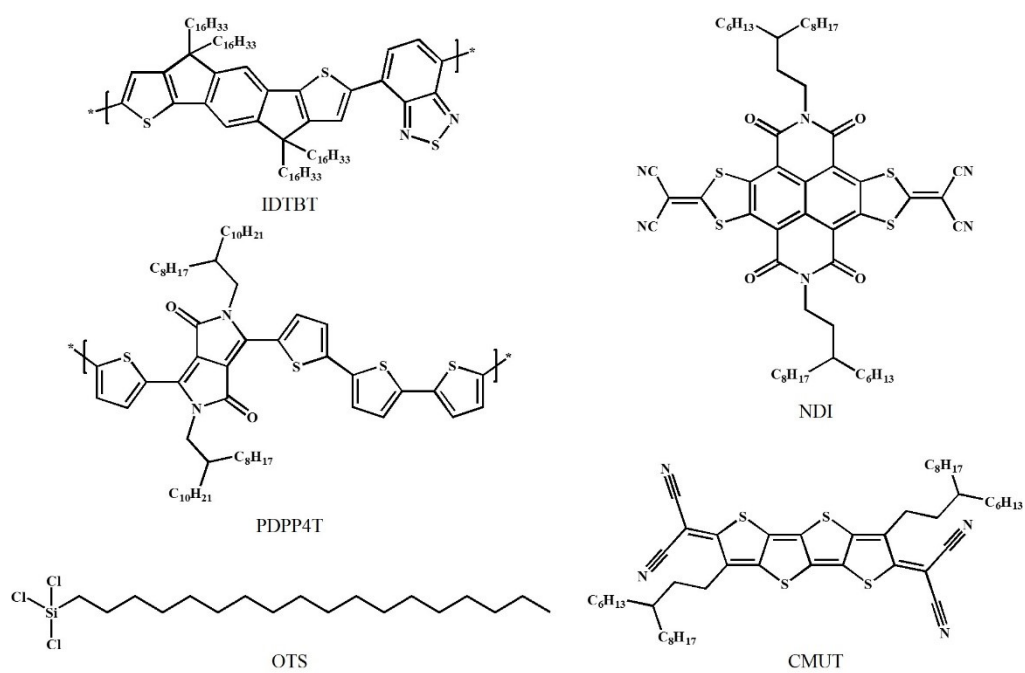

Fig. S9. Chemical structures of the compounds used in this study.
